# Supplementary material
Source: publisher figshare collection journal article supplement (https://sage.figshare.com/ndownloader/files/16214435)
Supplement: Supplementary file 1 [file 16214435]

## Appendix 6:

### Box 1 - Individual barriers to uptake of screening

Language barriers[1-5]; low literacy[4, 5]; time limitations[1, 4]; perceived time and cost[6]; negative perceptions and beliefs[2-4, 7-9]; perceived test accuracy[4]; low perceived benefit of screening[10-12]; low perceived cancer risk[2, 4, 13]; low priority[4]; fear of test and outcome[1, 4, 6, 8-10, 12, 14-19]; procrastination[1]; fatalism[5, 11, 13]; belief that screening is unnecessary without symptoms [13, 15, 20]; distrust[2, 4, 5, 16]; confidence in traditional medicine[2, 8]; cultural beliefs[1-3, 21]; false beliefs[1, 11, 22]; shame[5, 23]; embarrassment[1, 4-6, 15, 19, 24]; anticipated pain and discomfort[13, 15, 16, 18, 24]; disgust[8]; stigma[9, 13, 16, 21]; threats to modesty[5, 6, 13, 16]; spiritual beliefs[5]; issues with disclosure[9, 21]; patriarchal beliefs[5]; masculinity[3]; vulnerability[24]; lack of acculturation[20, 25]; and undocumented status[16]. In particular, the inequity of screening participation was highlighted and the likelihood of attending or being screened was influenced by the following factors: age[2, 4, 26] [27]; gender[4, 27, 28]; comorbidities[28]; education[25-29]; income[25, 26]; race and ethnicity[4, 18, 27, 28, 30]; socioeconomic status[4, 11, 28]; rural[28]; and home situation[18, 26, 27]. Overuse of screening was linked to higher education and different perceptions of risk[31].

1. Azami-Aghdash, S., et al., *Breast Cancer Screening Barriers from the Womans Perspective: a Meta-synthesis*. Asian Pacific journal of cancer prevention : APJCP, 2015. **16**(8): p. 3463-3471.
2. Azeem, E., et al., *Barriers to colorectal cancer screening in Asia: A systematic review*. Tropical Journal of Pharmaceutical Research, 2016. **15**(7): p. 1543-1548.
3. Honein-AbouHaidar, G.N., et al., *Systematic review and meta-study synthesis of qualitative studies evaluating facilitators and barriers to participation in colorectal cancer screening*. Cancer Epidemiology Biomarkers and Prevention, 2016. **25**(6): p. 907-917.
4. Javanparast, S., et al., *How equitable are colorectal cancer screening programs which include FOBTs? A review of qualitative and quantitative studies*. Preventive Medicine, 2010. **50**(4): p. 165-172.
5. Lee, H.Y. and S. Vang, *Barriers to Cancer Screening in Hmong Americans: The Influence of Health Care Accessibility, Culture, and Cancer Literacy*. Journal of Community Health, 2010. **35**(3): p. 302-314.
6. Oh, K.M., K.L. Taylor, and K.H. Jacobsen, *Breast Cancer Screening Among Korean Americans: A Systematic Review*. Journal of Community Health, 2017. **42**(2): p. 324-332.

7. Briss, P., et al., *Promoting informed decisions about cancer screening in communities and healthcare systems*. American Journal of Preventive Medicine, 2004. **26**(1): p. 67-80.
8. Honein-AbouHaidar, G.N., et al., *Benefits and barriers to participation in colorectal cancer screening: A protocol for a systematic review and synthesis of qualitative studies*. BMJ Open, 2014. **4** (2) (no pagination)(e004508).
9. Hendry, M., et al., *Are women ready for the new cervical screening protocol in England A systematic review and qualitative synthesis of views about human papillomavirus testing*. British Journal of Cancer, 2012. **107**(2): p. 243-254.
10. Bromley, E.G., et al., *Explaining persistent under-use of colonoscopic cancer screening in African Americans: A systematic review*. Preventive Medicine, 2015. **71**: p. 40-48.
11. de los Monteros, K.E. and L.C. Gallo, *The Relevance of Fatalism in the Study of Latinas' Cancer Screening Behavior: A Systematic Review of the Literature*. International Journal of Behavioral Medicine, 2011. **18**(4): p. 310-318.
12. May, F.P., *Black-White disparities in colorectal cancer incidence, screening, and outcomes*. Dissertation Abstracts International: Section B: The Sciences and Engineering, 2016. **76**(9-B(E)): p. No Pagination Specified.
13. Johnson, C.E., et al., *Cervical cancer screening among immigrants and ethnic minorities: A systematic review using the health belief model*. Journal of Lower Genital Tract Disease, 2008. **12**(3): p. 232-241.
14. Chorley, A.J., et al., *Experiences of cervical screening and barriers to participation in the context of an organised programme: a systematic review and thematic synthesis*. Psycho-Oncology, 2017. **26**(2): p. 161-172.
15. Deng, S.X., et al., *Factors influencing patient compliance in colorectal cancer screening: qualitative research synthesis. [Chinese]*. National Medical Journal of China, 2010. **90**(38): p. 2679-2683.
16. Keihanian, T., D.A. Sussman, and L.J. Tamariz, *Colorectal cancer screening barriers among minorities in the United States: A systematic review and meta-analysis*. American Journal of Gastroenterology, 2015. **110**: p. S943.
17. Powe, B.D., R. Faulkenberry, and L. Harmond, *A Review of Intervention Studies That Seek to Increase Colorectal Cancer Screening Among African-Americans*. American Journal of Health Promotion, 2010. **25**(2): p. 92-99.
18. Schueler, K.M., P.W. Chu, and R. Smith-Bindman, *Factors associated with mammography utilization: A systematic quantitative review of the literature*. Journal of Women's Health, 2008. **17**(9): p. 1477-1498.
19. Vedel, I., et al., *Barriers and facilitators to breast and colorectal cancer screening of older adults in primary care: A systematic review*. Journal of Geriatric Oncology, 2011. **2**(2): p. 85-98.
20. Oh, K.M. and K.H. Jacobsen, *Colorectal cancer screening among Korean Americans: a systematic review*. Journal of community health, 2014. **39**(2): p. 193-200.
21. Sheldon, L.K. and A.M. AbuFannouneh, *Nurse-led programs to improve cervical cancer screening in Sub-Saharan Africa*. Cancer Nursing, 2015. **1**: p. S24-S25.
22. Asonganyi, E., et al., *Factors Affecting Compliance with Clinical Practice Guidelines for Pap Smear Screening among Healthcare Providers in Africa: Systematic Review and Meta-Summary of 2045 Individuals*. PLoS ONE, 2013. **8** (9) (no pagination)(e72712).
23. Hurtado-de-Mendoza, A., et al., *Addressing cancer control needs of African-born immigrants in the US: A systematic literature review*. Preventive Medicine, 2014. **67**: p. 89-99.
24. McLachlan, S.A., A. Clements, and J. Austoker, *Patients' experiences and reported barriers to colonoscopy in the screening context--a systematic review of the literature*. Patient Education & Counseling, 2012. **86**(2): p. 137-46.
25. Holden, D.J., et al., *Systematic review: Enhancing the use and quality of colorectal cancer screening*. Annals of Internal Medicine, 2010. **152**(10): p. 668-676.

26. Jerome-D'Emilia, B., *A systematic review of barriers and facilitators to mammography in Hispanic women*. Journal of Transcultural Nursing, 2015. **26**(1): p. 73-82.
27. Wools, A., E.A. Dapper, and J.R. de Leeuw, *Colorectal cancer screening participation: a systematic review*. European journal of public health, 2016. **26**(1): p. 158-168.
28. Guessous, I., et al., *Colorectal cancer screening barriers and facilitators in older persons*. Preventive Medicine, 2010. **50**(1-2): p. 3-10.
29. Dreier, M., et al., *Mammography and Cervical Cancer Screening - A Systematic Review about Women's Knowledge, Attitudes and Participation in Germany*. Gesundheitswesen, 2012. **74**(11): p. 722-735.
30. Yedjou, C.G., et al., *Assessing the racial and ethnic disparities in breast cancer mortality in the United States*. International Journal of Environmental Research and Public Health, 2017. **14** (5) (no pagination)(486).
31. Pannikottu, J., et al., *Determinants of overuse of cancer screening: A systematic review*. Journal of the American Geriatrics Society, 2017. **65**: p. S252.
